# Supplementary material for: Black tea protects against hypertension-associated endothelial dysfunction through alleviation of endoplasmic reticulum stress
Source: PubMed Central journal article supplement (PMC4432571; doi:10.1038/srep10340), 2015-05-15
Supplement: srep10340-s1.pdf [file srep10340-s1.pdf]

Title: Black tea protects against hypertension-associated endothelial dysfunction through alleviation of endoplasmic reticulum stress

Authors: Wai San Cheang, Ching Yuen Ngai, Ye Yen Tam, Xiao Yu Tian, Wing Tak Wong, Yang Zhang, Chi Wai Lau, Zhenyu Chen, Zhao-Xiang Bian, Yu Huang, Fung Ping Leung

## Supplementary material

The manufacturer “Quality Phytochemical LLC” has provided the certificate of analysis of the black tea extract.

**Quality Phytochemicals LLC**

---

**Certificate of Analysis**

|                     |                                                                                    |
|---------------------|------------------------------------------------------------------------------------|
| Product Name        | Theaflavins                                                                        |
| Product Code        | QP-Black Tea Extract                                                               |
| Synonyms:           | TF                                                                                 |
| Source:             | <i>Camellia sinensis O. Ktze.</i>                                                  |
| Active Ingredients: | Theaflavin, Theaflavin-3-gallate, Theaflavin-3'-gallate, Theaflavin-3,3'-digallate |
| Batch #             | TJtf130311                                                                         |
| Date of Report:     | <u>3/13/2013</u>                                                                   |

  

| Analysis      | Specification | Results  |
|---------------|---------------|----------|
| Assay by HPLC |               |          |
| Theaflavins   | 70%           | 72.34%   |
| Appearance    | Brown powder  | complies |

  

|                   |                                      |
|-------------------|--------------------------------------|
| <b>Storage</b>    | +4 °C, Do not freeze.                |
| <b>Shelf life</b> | <u>2 years</u> when properly stored. |

---

|                                                                                                                                             |                                                                                                                                                |
|---------------------------------------------------------------------------------------------------------------------------------------------|------------------------------------------------------------------------------------------------------------------------------------------------|
| 13 Dexter Rd., East Brunswick, NJ 08816,<br><a href="http://www.qualityphytochemicalsllc.com">http://www.qualityphytochemicalsllc.com</a> ; | Phone : (908)510-9277; Fax: (732)390-0524<br>Email: <a href="mailto:sales@qualityphytochemicalsllc.com">sales@qualityphytochemicalsllc.com</a> |
|---------------------------------------------------------------------------------------------------------------------------------------------|------------------------------------------------------------------------------------------------------------------------------------------------|

## Supplementary Figure 1

The black tea extract was assayed by routine HPLC methods. It showed the specification of theaflavins as 70% and analyzed the active ingredients of the black tea extract: theaflavins, theaflavin-3-gallate, theaflavin-3'-gallate, and theaflavin-3,3'-digallate.

Confidential. For research only NOT for regulatory filing

### LCMS REPORT

Compound ID :  
 Sample ID : TY00073-CHS  
 Injection Date : 22. Feb. 2013  
 Inj. Vol. : 1.0 ul  
 Location : P1-F-01  
 Acq Method : D:\DATA\20130221\10-80AB\_R.M  
 Data Filename : D:\COPY\JJF\CHS\CHS-10-80.D  
 Instrument&Column: LCMS-Y(11#603)

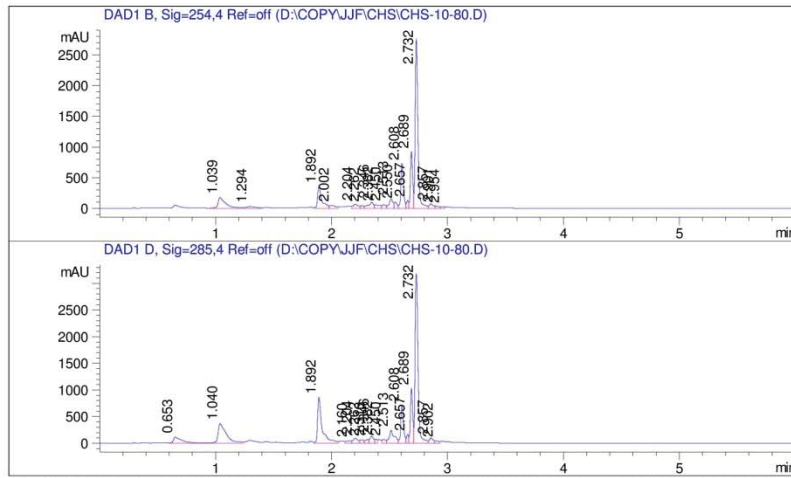

### Integration Result

```
=====
```

Signal 1 : DAD1 B, Sig=254,4 Ref=off

| Peak # | RT [min] | Area     | Height  | Height % | Width [min] | Area % |
|--------|----------|----------|---------|----------|-------------|--------|
| 1      | 1.039    | 875.394  | 177.280 | 3.020    | 0.067       | 7.857  |
| 2      | 1.294    | 194.704  | 31.508  | 0.537    | 0.082       | 1.747  |
| 3      | 1.892    | 935.042  | 354.890 | 6.045    | 0.038       | 8.392  |
| 4      | 2.002    | 178.604  | 50.116  | 0.854    | 0.052       | 1.603  |
| 5      | 2.204    | 209.744  | 68.257  | 1.163    | 0.043       | 1.882  |
| 6      | 2.262    | 95.253   | 47.478  | 0.809    | 0.027       | 0.855  |
| 7      | 2.346    | 318.438  | 101.441 | 1.728    | 0.043       | 2.858  |
| 8      | 2.382    | 187.404  | 58.942  | 1.004    | 0.041       | 1.682  |
| 9      | 2.450    | 130.281  | 61.964  | 1.055    | 0.030       | 1.169  |
| 10     | 2.513    | 378.577  | 158.294 | 2.696    | 0.033       | 3.398  |
| 11     | 2.550    | 165.277  | 99.051  | 1.687    | 0.023       | 1.483  |
| 12     | 2.608    | 1163.674 | 722.832 | 12.312   | 0.025       | 10.444 |
| 13     | 2.657    | 159.675  | 126.129 | 2.148    | 0.019       | 1.433  |
| 14     | 2.689    | 1269.828 | 915.487 | 15.594   | 0.022       | 11.397 |

```
=====
```

Confidential. For research only NOT for regulatory filing

| Peak # | RT [min] | Area     | Height   | Height % | Width [min] | Area % |
|--------|----------|----------|----------|----------|-------------|--------|
| 15     | 2.732    | 4549.222 | 2755.484 | 46.935   | 0.025       | 40.829 |
| 16     | 2.857    | 186.493  | 75.057   | 1.278    | 0.035       | 1.674  |
| 17     | 2.901    | 79.271   | 37.570   | 0.640    | 0.030       | 0.711  |
| 18     | 2.954    | 65.257   | 29.104   | 0.496    | 0.032       | 0.586  |

Operator: \_\_\_\_\_

Date: \_\_\_\_\_

Based on HPLC, theaflavins were calculated as following:

| Compound Name             | TR    | Content |
|---------------------------|-------|---------|
| theaflavins               | 2.608 | 0.12    |
| theaflavin-3-gallate      | 2.689 | 0.13    |
| theaflavin-3'-galate      | 2.732 | 0.46    |
| theaflavin-3,3'-digallate |       |         |

**Supplementary Table 1. Quantitative analysis of black tea extract.**

**Title: Black tea protects against hypertension-associated endothelial dysfunction through alleviation of endoplasmic reticulum stress**

**Authors: Wai San Cheang, Ching Yuen Ngai, Ye Yen Tam, Xiao Yu Tian, Wing Tak Wong, Yang Zhang, Chi Wai Lau, Zhenyu Chen, Zhao-Xiang Bian, Yu Huang, Fung Ping Leung**

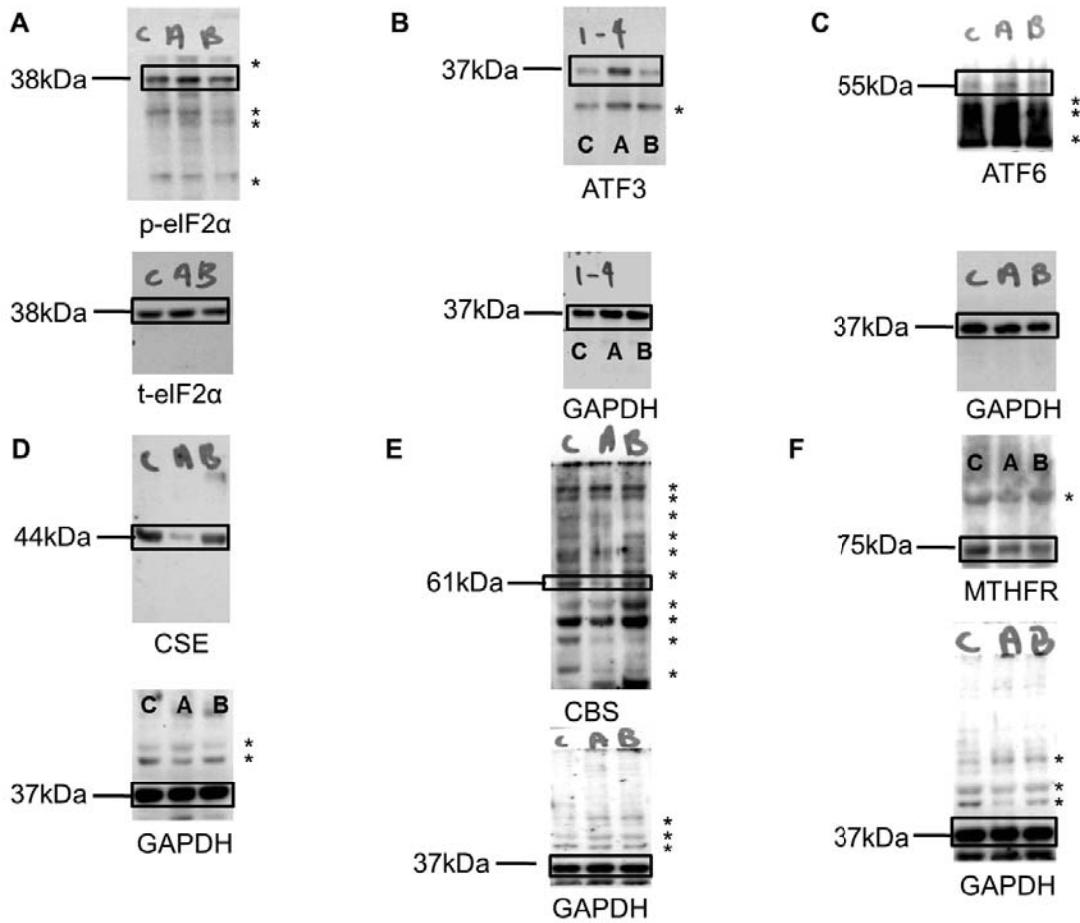

**Supplementary Figure 2.** Full-length images of Western blots scanned. Rectangular boxes indicate cropped regions used in the representative images. Full-length images of (A) p-eIF2α and t-eIF2α of Figure 4A, (B) ATF3 and GAPDH of Figure 4B, (C) ATF6 and GAPDH of Figure 4C, (D) CSE and GAPDH of Figure 4D, (E) CBS and GAPDH of Figure 4E, (F) MTHFR and GAPDH of Figure 4F. C, control; A, Ang II; B, Ang II+BT. \* Nonspecific bands.
